# Supplementary material for: Mechanistic insights into CO2 activation on pristine, vacancy-containing and doped goldene: a single-atom layer of gold
Source: Royal Society of Chemistry journal article supplement (doi:10.1039/d4cp03087g), 2024-01-01
Supplement: d4cp03087g1.pdf [file d4cp03087g1.pdf]

## Supporting Information

### Mechanistic Insights into CO<sub>2</sub> Activation on Pristine, Defected and Doped Goldene: A Single-Atom Layer of Gold

Kamal Kumar, Nora de Leeuw, Jost Adam and Abhishek Kumar Mishra\*

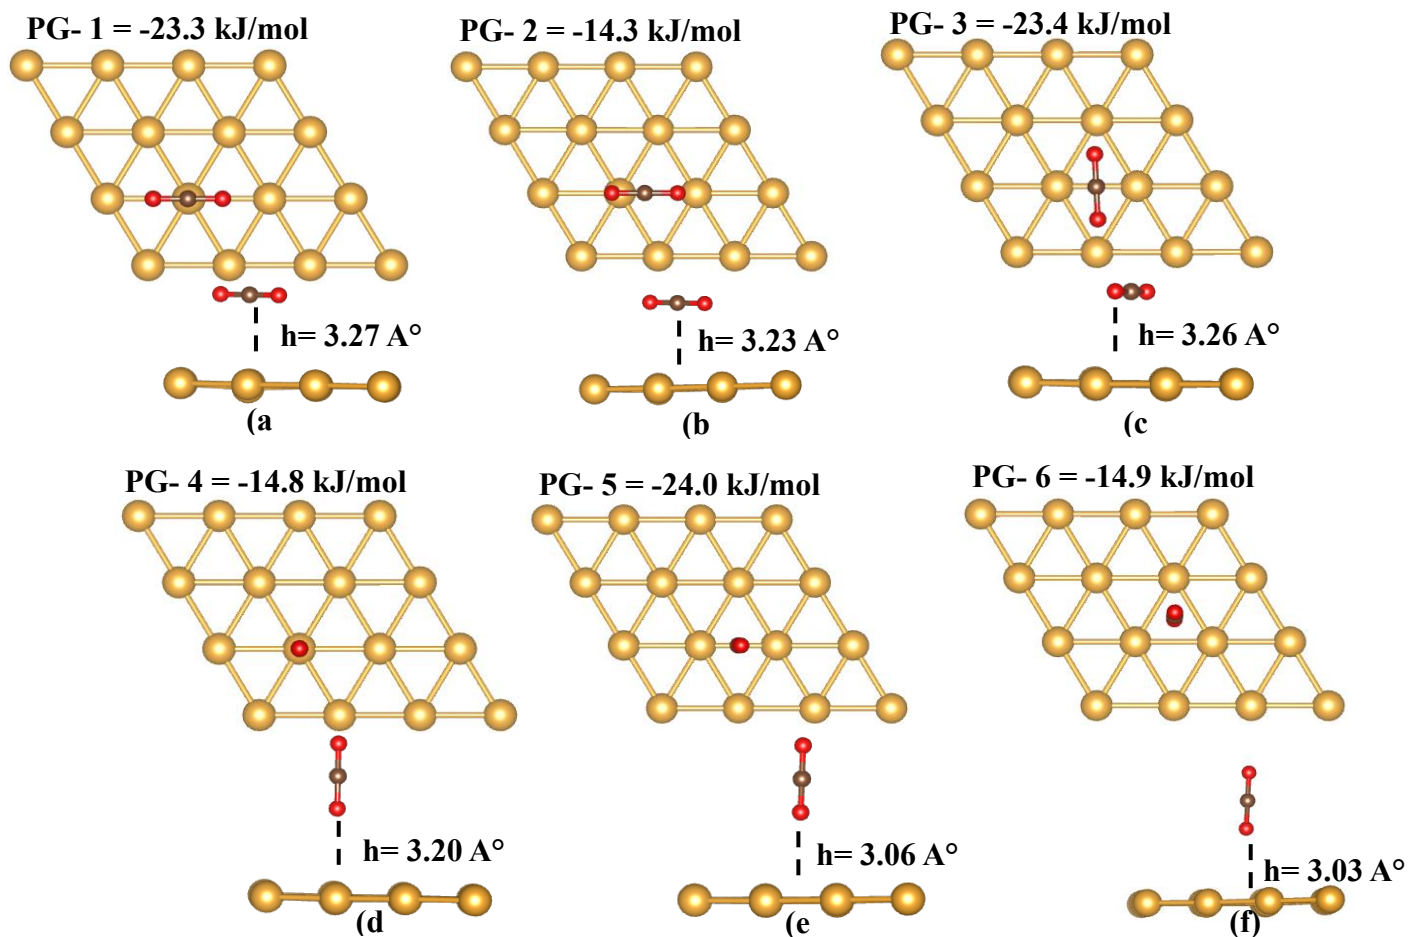

Figure S1. Top and side view of optimized geometries of CO<sub>2</sub> at 4×4×1 supercell

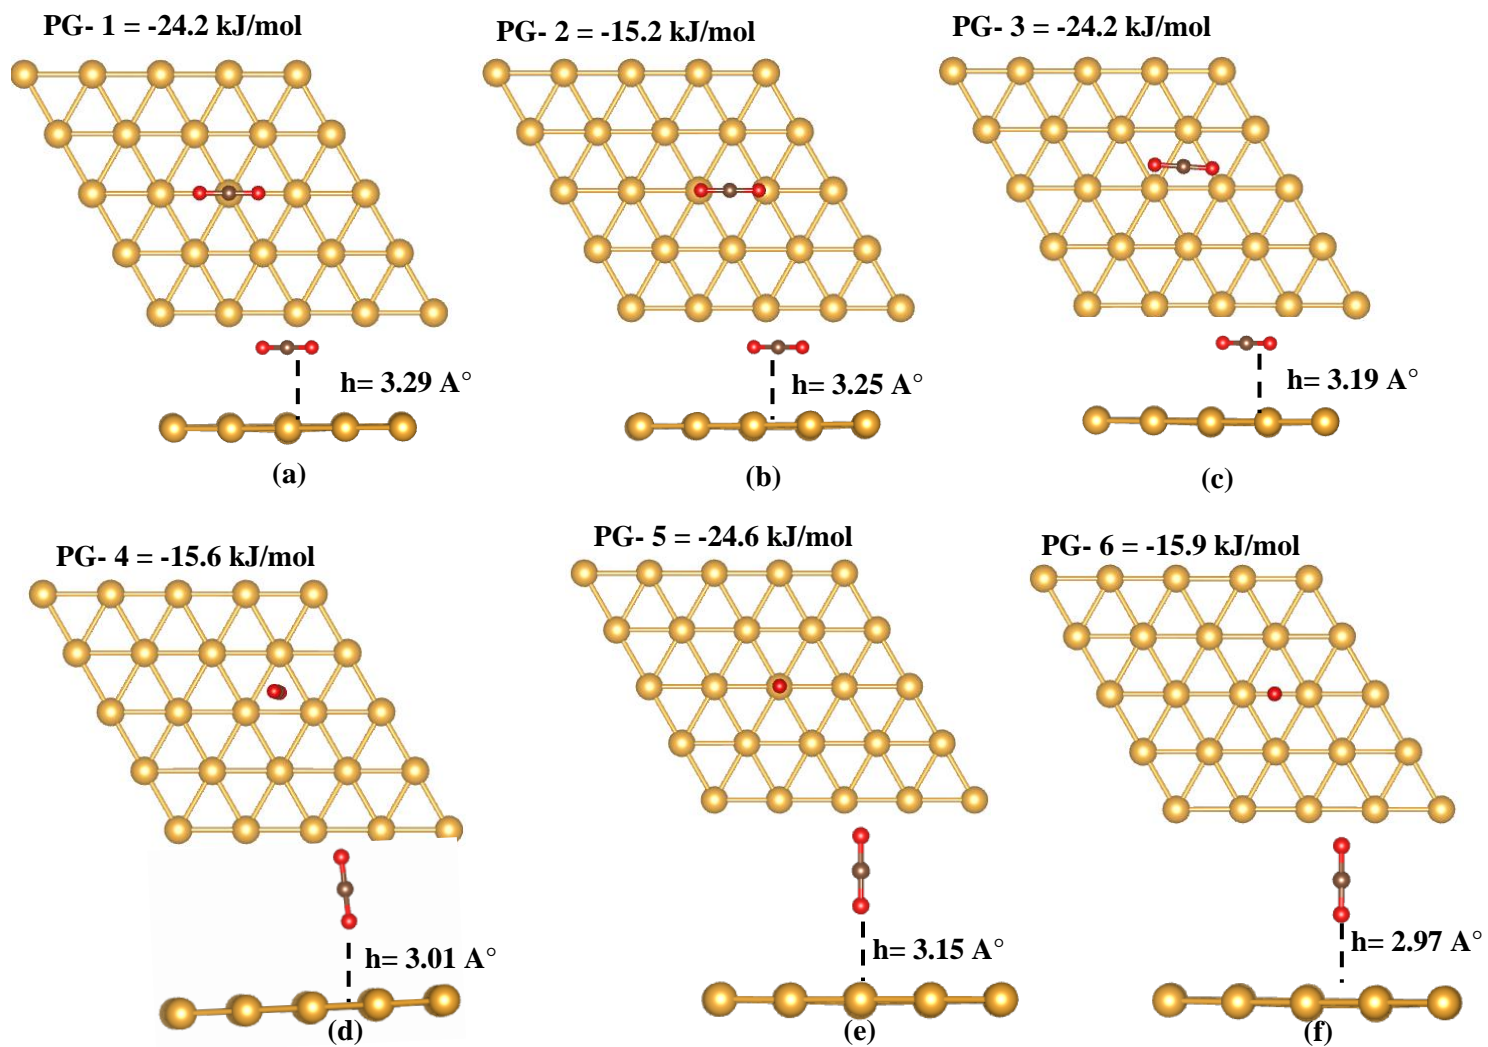

**Figure S2.** Top and side view of optimized geometries of CO<sub>2</sub> at 5×5×1 supercell

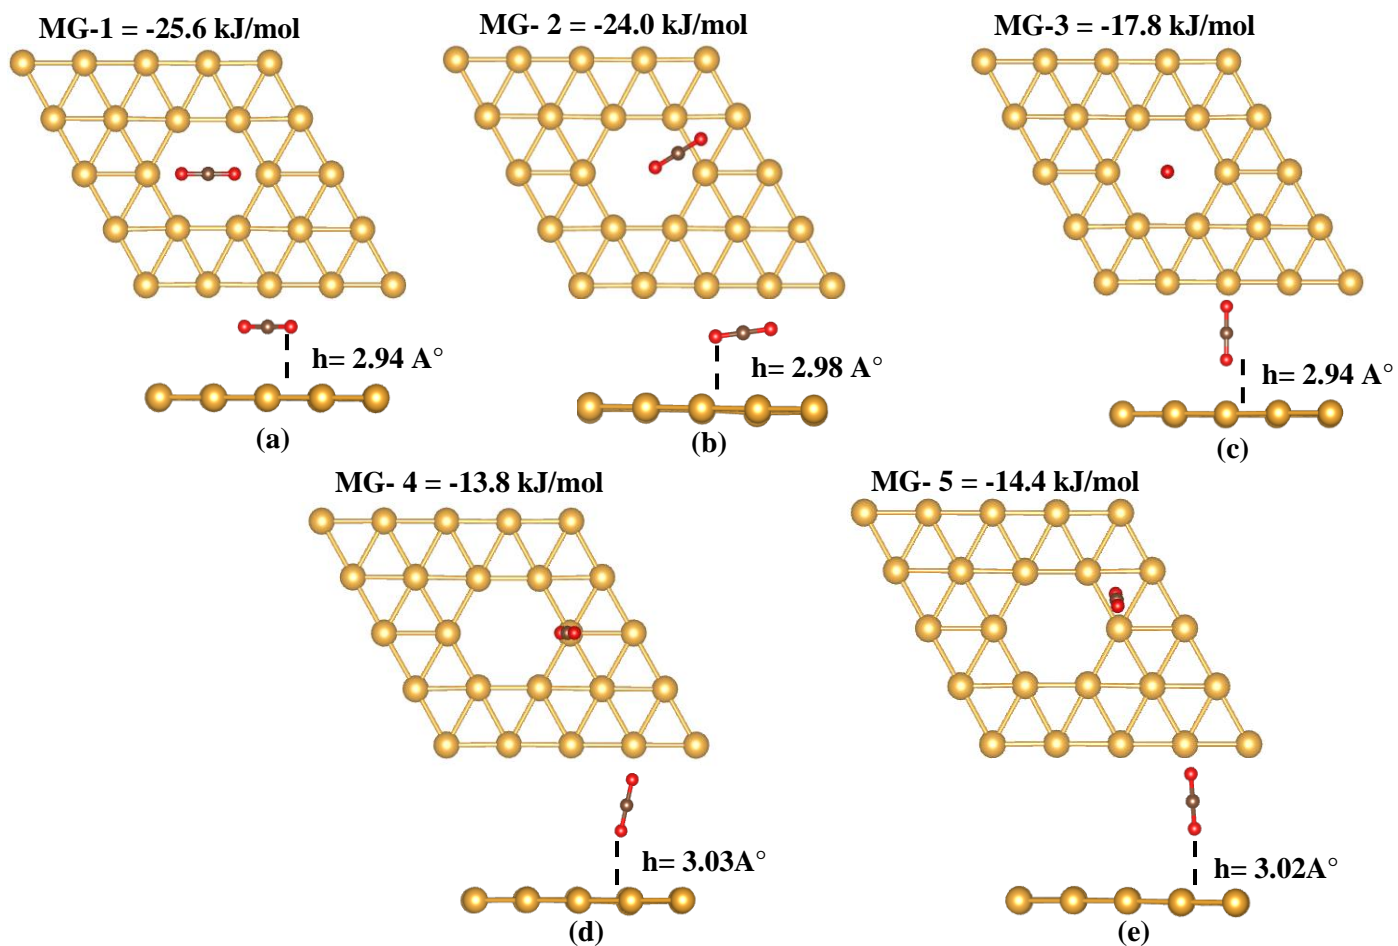

**Figure S3.** Top and side view of optimized geometries of CO<sub>2</sub> at MG supercell

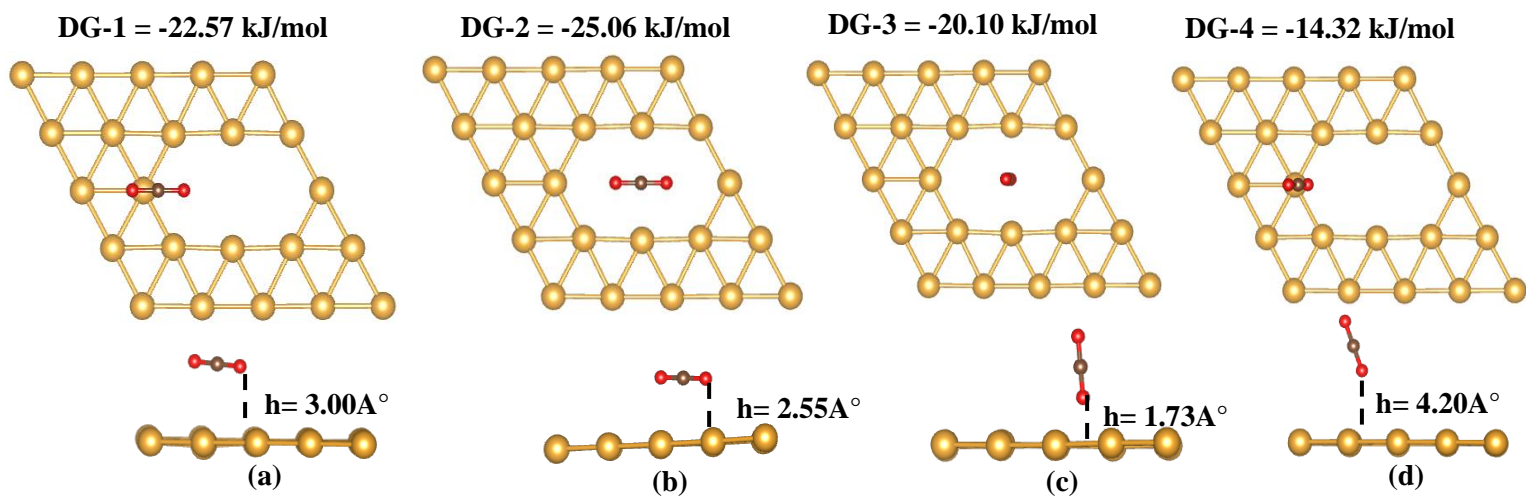

**Figure S4.** Top and side view of optimized geometries of CO<sub>2</sub> at DG supercell

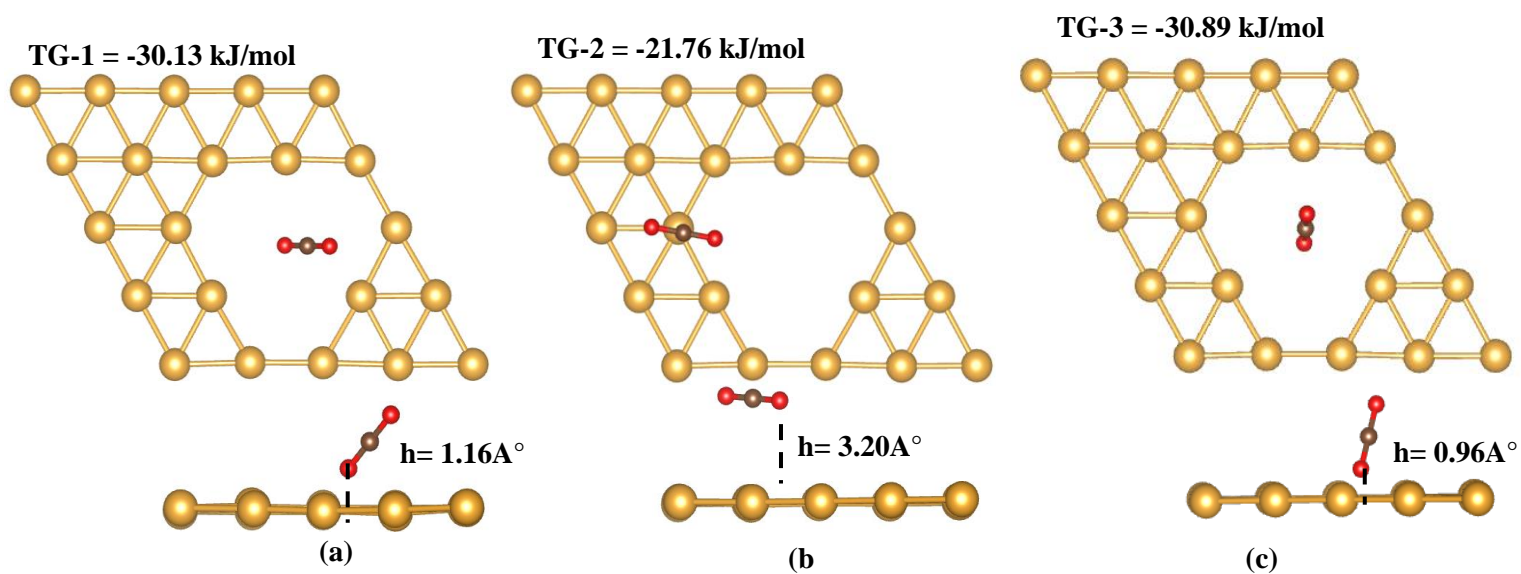

**Figure S5.** Top and side view of optimized geometries of CO<sub>2</sub> at TG supercell

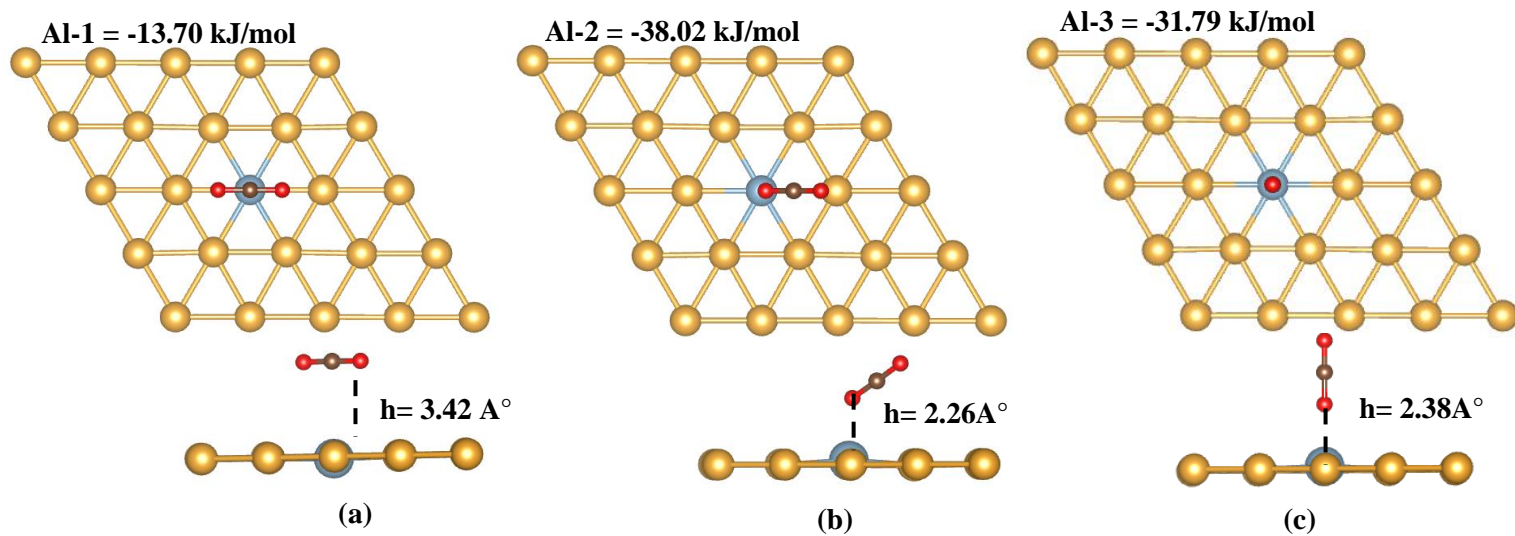

**Figure S6.** Top and side view of optimized geometries of CO<sub>2</sub> at Al@PG supercell

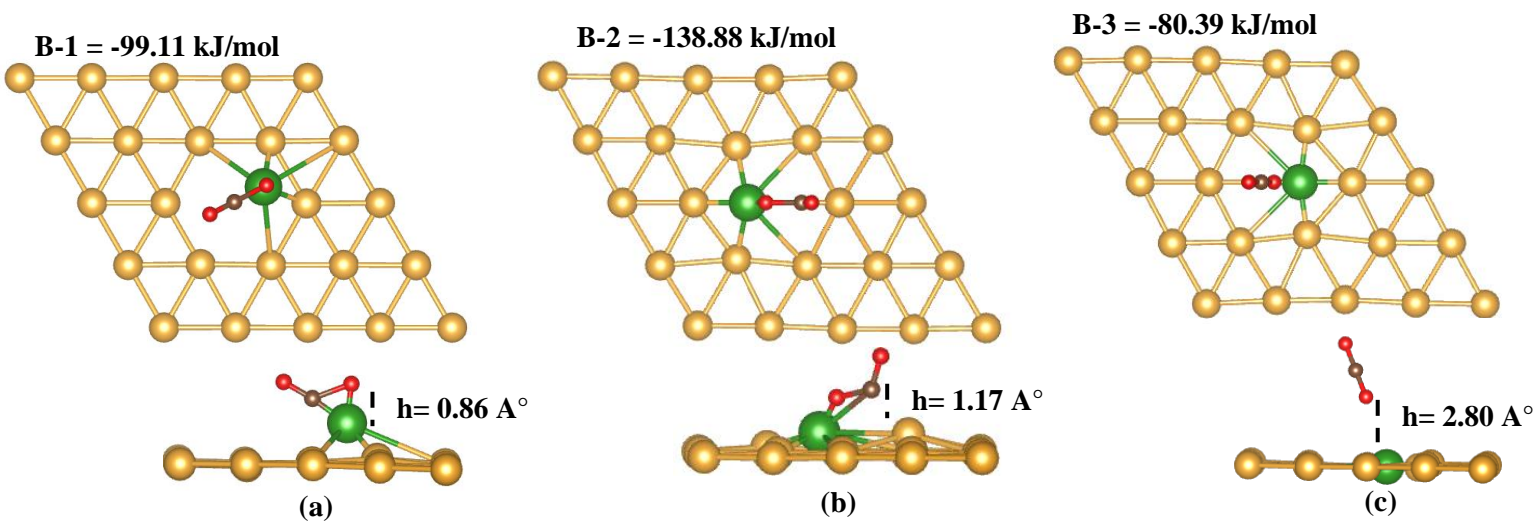

**Figure S7.** Top and side view of optimized geometries of CO<sub>2</sub> at B@PG supercell

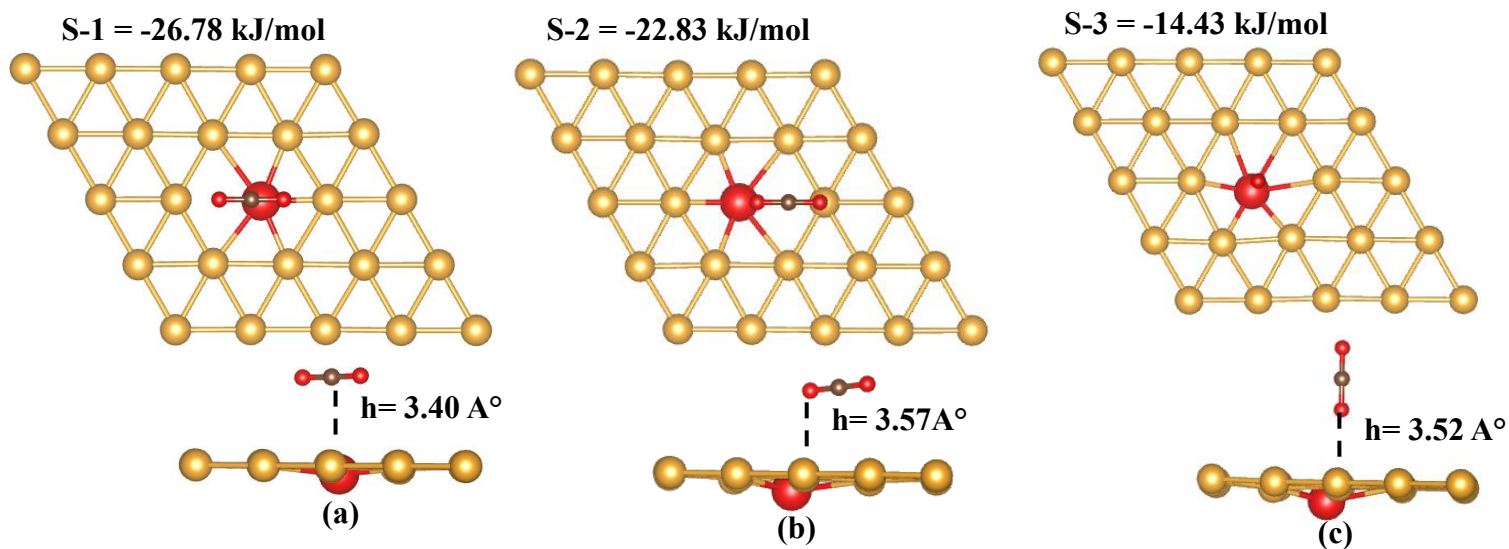

**Figure S8.** Top and side view of optimized geometries of CO<sub>2</sub> at S@PG supercell

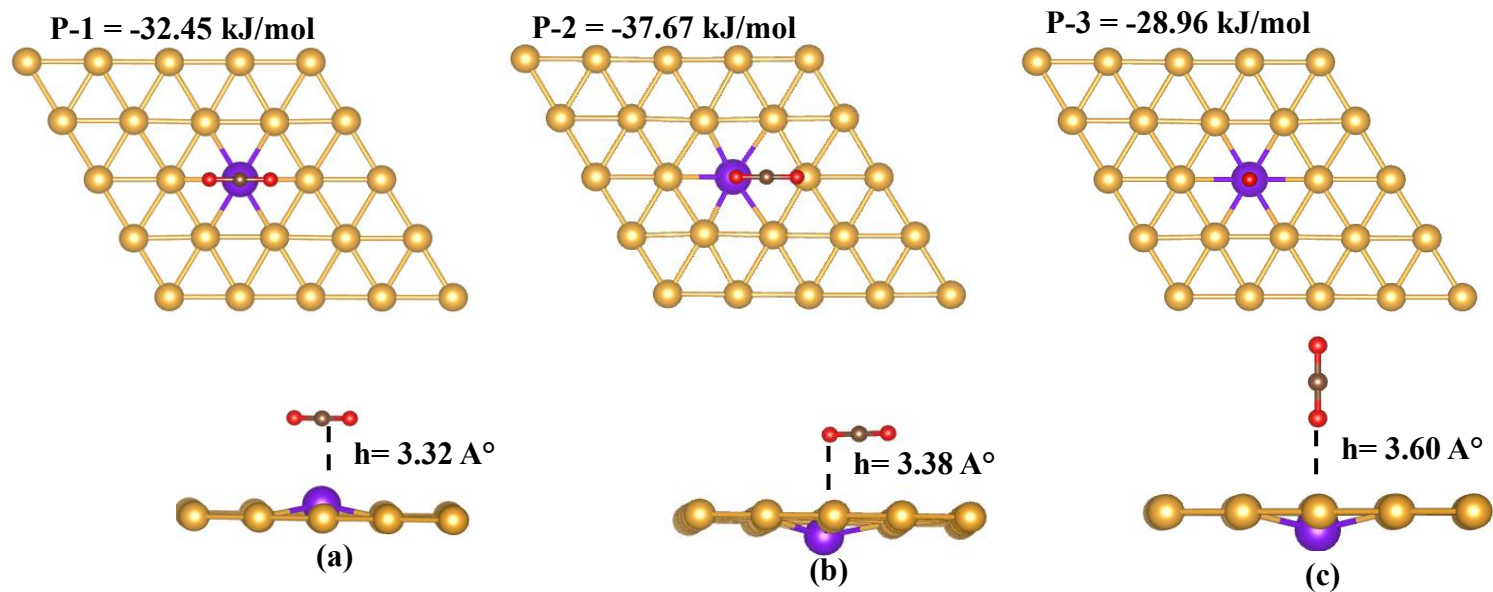

**Figure S9.** Top and side view of optimized geometries of CO<sub>2</sub> at P@PG supercell

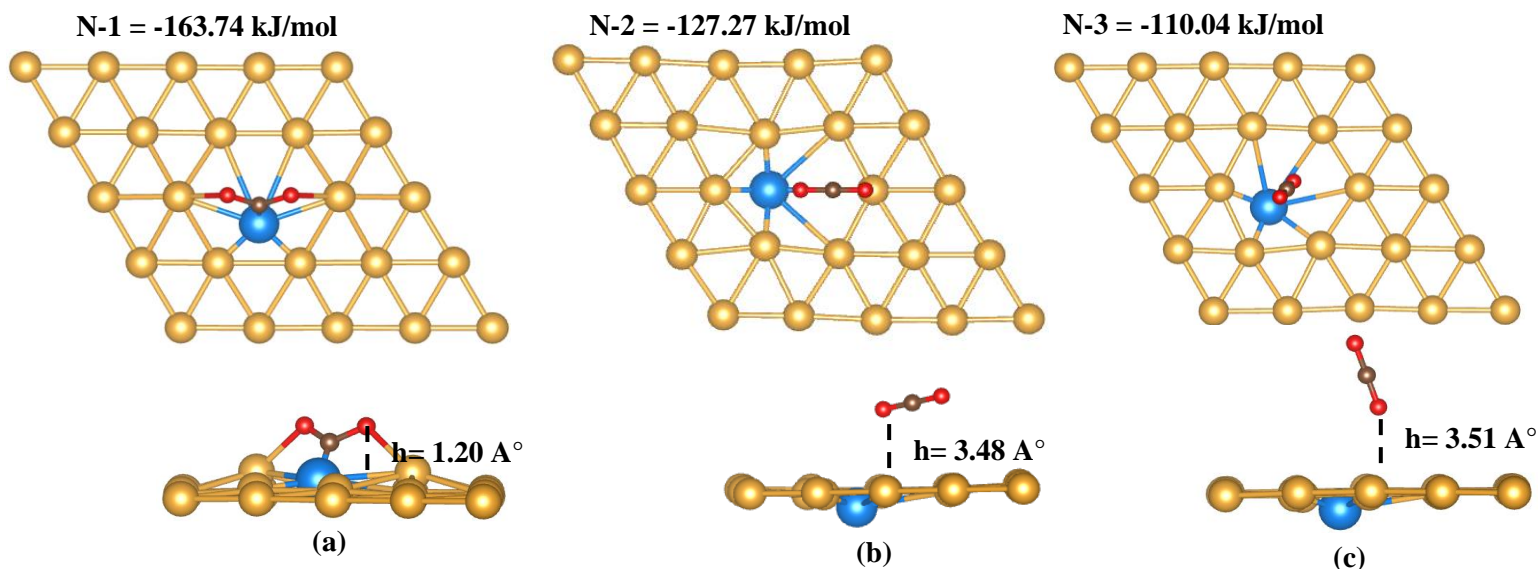

**Figure S10.** Top and side view of optimized geometries of CO<sub>2</sub> at N@PG supercell

**Table S1** Adsorption energy  $E_{ad\_PG}$  (kJ/mol), adsorption height  $h$  (Å), bond length  $l$  (Å) and bond angle of CO<sub>2</sub> molecule  $\theta$  (°) for CO<sub>2</sub>@PG system

| Conf. |             | 4×4×1        |             |             |             |               | 5×5×1        |             |             |      |          |
|-------|-------------|--------------|-------------|-------------|-------------|---------------|--------------|-------------|-------------|------|----------|
|       |             | $E_{ad\_PG}$ | $h$         | $l$         |             | $\theta$      | $E_{ad\_PG}$ | $h$         | $l$         |      | $\theta$ |
|       |             |              |             | Au-Au       | C-O         |               |              |             | Au-Au       | C-O  |          |
| A     | ∥(P<br>G-1) | -23.3        | 3.27        | 2.74        | 1.17        | 179.6°        | -24.2        | 3.29        | 2.75        | 1.17 | 179.9°   |
|       | ⊥(PG<br>-2) | -14.3        | 3.23        | 2.74        | 1.17        | 179.8°        | -15.2        | 3.25        | 2.74        | 1.17 | 179.8°   |
| B     | ∥(P<br>G-3) | -23.4        | 3.26        | 2.74        | 1.17        | 179.8°        | -24.2        | 3.19        | 2.74        | 1.17 | 179.9°   |
|       | ⊥(PG<br>-4) | -14.8        | 3.20        | 2.74        | 1.18        | 179.9°        | -15.6        | 3.01        | 2.74        | 1.17 | 179.9°   |
| C     | ∥(P<br>G-5) | <b>-24.0</b> | <b>3.06</b> | <b>2.74</b> | <b>1.18</b> | <b>179.9°</b> | <b>-24.6</b> | <b>3.15</b> | <b>2.74</b> | 1.18 | 179.9°   |
|       | ⊥(PG<br>-6) | -14.9        | 3.03        | 2.74        | 1.18        | 179.8°        | -15.9        | 2.97        | 2.75        | 1.18 | 179.9°   |

**Table S2** Calculated adsorption energy  $E_{ad\_def}$  (kJ/mol), adsorption height  $h$  (Å), bond length  $l$  (Å), bond angle  $\theta$ , of defected goldene after CO<sub>2</sub> adsorption.

|           |             | $E_{ad\_def}$ | $h$         | $L$              |             | $\theta$      |
|-----------|-------------|---------------|-------------|------------------|-------------|---------------|
|           |             |               |             | Au-Au            | C-O         |               |
| <b>MG</b> | <b>MG-1</b> | <b>-25.6</b>  | <b>2.94</b> | <b>2.68-2.76</b> | <b>1.17</b> | <b>179.8°</b> |
|           | <b>MG-2</b> | -24.0         | 2.98        | 2.69-2.75        | 1.17        | 179.5°        |
|           | <b>MG-3</b> | -17.8         | 2.94        | 2.69-2.75        | 1.18        | 179.9°        |
|           | <b>MG-4</b> | -13.8         | 3.03        | 2.68-2.76        | 1.18        | 179.8°        |
|           | <b>MG-5</b> | -14.4         | 3.02        | 2.69-2.73        | 1.17        | 179.9°        |
| <b>DG</b> | <b>DG-1</b> | -22.57        | 3.00        | 2.69-2.77        | 1.18        | 179.5°        |
|           | <b>DG-2</b> | <b>-25.06</b> | <b>2.55</b> | <b>2.69-2.77</b> | <b>1.18</b> | <b>179.8°</b> |
|           | <b>DG-3</b> | -20.10        | 1.73        | 2.69-2.80        | 1.18        | 179.9°        |
|           | <b>DG-4</b> | -14.32        | 4.20        | 2.70-2.77        | 1.17        | 179.7°        |
| <b>TG</b> | <b>TG-1</b> | -30.13        | 1.16        | 2.68-2.81        | 1.18        | 179.7°        |
|           | <b>TG-2</b> | -21.76        | 3.20        | 2.68-2.78        | 1.17        | 179.8°        |
|           | <b>TG-3</b> | <b>-30.89</b> | <b>0.96</b> | <b>2.68-2.76</b> | <b>1.18</b> | <b>179.7°</b> |

**Table S3** Optimized parameters of CO<sub>2</sub> adsorbed X@PG systems along with adsorption energies  $E_{ax}$  (kJ/mol), adsorption height  $h$ (Å), bond lengths  $l$ (Å) and bond angle  $\theta$

| <b>X</b>  | <b>Conf.</b> | $E_{ax}$       | <b>H</b>    | <b>l</b>    |             |             | $\theta$      |
|-----------|--------------|----------------|-------------|-------------|-------------|-------------|---------------|
|           |              |                |             | Au-Au       | C-O         | Au-X        |               |
| <b>Al</b> | Al-1         | -13.70         | 3.42        | 2.76        | 1.17        | 2.68        | 178.9°        |
|           | <b>Al-2</b>  | <b>-38.02</b>  | <b>2.66</b> | <b>2.76</b> | <b>1.19</b> | <b>2.69</b> | 178.6°        |
|           | Al-3         | -31.79         | 2.38        | 2.74        | 1.18        | 2.69        | 178.9°        |
| <b>B</b>  | B-1          | -99.11         | 0.86        | 2.79        | 1.48        | 2.16        | 129.6°        |
|           | <b>B-2</b>   | <b>-138.88</b> | <b>1.17</b> | <b>2.92</b> | <b>1.39</b> | <b>3.35</b> | <b>119.9°</b> |
|           | B-3          | -80.39         | 2.80        | 2.98        | 1.18        | 3.58        | 179.7°        |
| <b>S</b>  | <b>S-1</b>   | <b>-26.78</b>  | <b>3.40</b> | <b>2.75</b> | <b>1.17</b> | <b>2.99</b> | <b>179.0°</b> |
|           | S-2          | -22.83         | 3.57        | 2.76        | 1.17        | 3.22        | 179.7°        |
|           | S-3          | -14.43         | 3.52        | 2.78        | 1.18        | 3.40        | 179.9°        |
| <b>P</b>  | P-1          | -32.45         | 3.32        | 2.77        | 1.18        | 2.72        | 178.9°        |
|           | <b>P-2</b>   | <b>-37.67</b>  | 3.38        | 2.75        | 1.17        | 2.90        | 179.9°        |
|           | P-3          | -28.96         | 3.60        | 2.80        | 1.17        | 2.74        | 179.9°        |



|          |            |                |             |             |             |             |               |
|----------|------------|----------------|-------------|-------------|-------------|-------------|---------------|
| <b>N</b> | <b>N-1</b> | <b>-163.74</b> | <b>1.20</b> | <b>2.90</b> | <b>1.28</b> | <b>3.59</b> | <b>120.9°</b> |
|          | N-2        | -117.27        | 3.48        | 2.99        | 1.17        | 3.48        | 179.7°        |
|          | N-3        | -110.04        | 3.51        | 2.78        | 1.17        | 3.70        | 179.9°        |

**Table S4** Bader charge analysis of amount of charge transfer on dopants (X= Al, B, S, P, N) and CO<sub>2</sub> molecule during the process of doping and adsorption

| <b>System</b>                       | <b>X</b> | <b>C</b> | <b>O</b>     | <b>CO<sub>2</sub></b> |
|-------------------------------------|----------|----------|--------------|-----------------------|
| <b>Al@PG</b>                        | 2.93     | ---      | ---          | ---                   |
| <b>B@PG</b>                         | 0.18     | ---      | ---          | ---                   |
| <b>S@PG</b>                         | -0.38    | ---      | ---          | ---                   |
| <b>P@PG</b>                         | -0.04    | ---      | ---          | ---                   |
| <b>N@PG</b>                         | -0.52    | ---      | ---          | ---                   |
| <b>CO<sub>2</sub>+PG (PG-5)</b>     | ---      | 3.99     | -2.01, -2.00 | -0.02                 |
| <b>CO<sub>2</sub>+MG (MG-1)</b>     | ---      | 3.99     | -1.98, -2.05 | -0.04                 |
| <b>CO<sub>2</sub>+DG (DG-2)</b>     | ---      | 3.99     | -2.01, -2.03 | -0.05                 |
| <b>CO<sub>2</sub>+TG (TG-3)</b>     | ---      | 3.99     | -2.03, -2.01 | -0.05                 |
| <b>CO<sub>2</sub>+ Al@PG (Al-2)</b> | 2.93     | 3.99     | -1.98, -2.10 | -0.09                 |
| <b>CO<sub>2</sub>+ B@PG (B-2)</b>   | 1.37     | 2.54     | -1.86, -1.90 | -1.22                 |
| <b>CO<sub>2</sub>+ S@PG (S-1)</b>   | -0.35    | 3.99     | -2.01, -2.01 | -0.03                 |
| <b>CO<sub>2</sub>+ P@PG (P-2)</b>   | 0.07     | 3.99     | -2.01, -2.00 | -0.02                 |
| <b>CO<sub>2</sub>+ N@PG (N-1)</b>   | -1.76    | 3.99     | -1.65, -1.68 | 0.66                  |
